# Supplementary material for: Mesoporous Mo2C/N-doped carbon heteronanowires as high-rate and long-life anode materials for Li-ion batteries
Source: Royal Society of Chemistry journal article supplement (doi:10.1039/c6ta03083a), 2016-01-01
Supplement: c6ta03083a1.pdf [file c6ta03083a1.pdf]

### Electronic Supplementary Information

Mesoporous Mo<sub>2</sub>C/N-doped carbon heteronanowires as high-rate and long-life anode materials for Li-ion batteries

Lichun Yang,<sup>a</sup> Xiang Li,<sup>a</sup> Sina He,<sup>b</sup> Gaohui Du,<sup>c</sup> Xiang Yu,<sup>b</sup> Jiangwen Liu,<sup>a</sup>

Qingsheng Gao,<sup>b,\*</sup> Renzong Hu,<sup>a</sup> Min Zhu<sup>a,\*</sup>

<sup>a</sup> School of Materials Science and Engineering, Guangdong Provincial Key Laboratory of Advanced Energy Storage Materials, South China University of Technology, Guangzhou, 510641, P. R. China.

E-mail: [memzhu@scut.edu.cn](mailto:memzhu@scut.edu.cn); Tel: +86-20-87112762

<sup>b</sup> Department of Chemistry, Jinan University, Guangzhou, 510632, P. R. China.

E-mail: [tqsgao@jnu.edu.cn](mailto:tqsgao@jnu.edu.cn); Tel: +86-20-85226506

<sup>c</sup> Institute of Physical Chemistry, Zhejiang Normal University, Jinhua, 321004, P. R. China

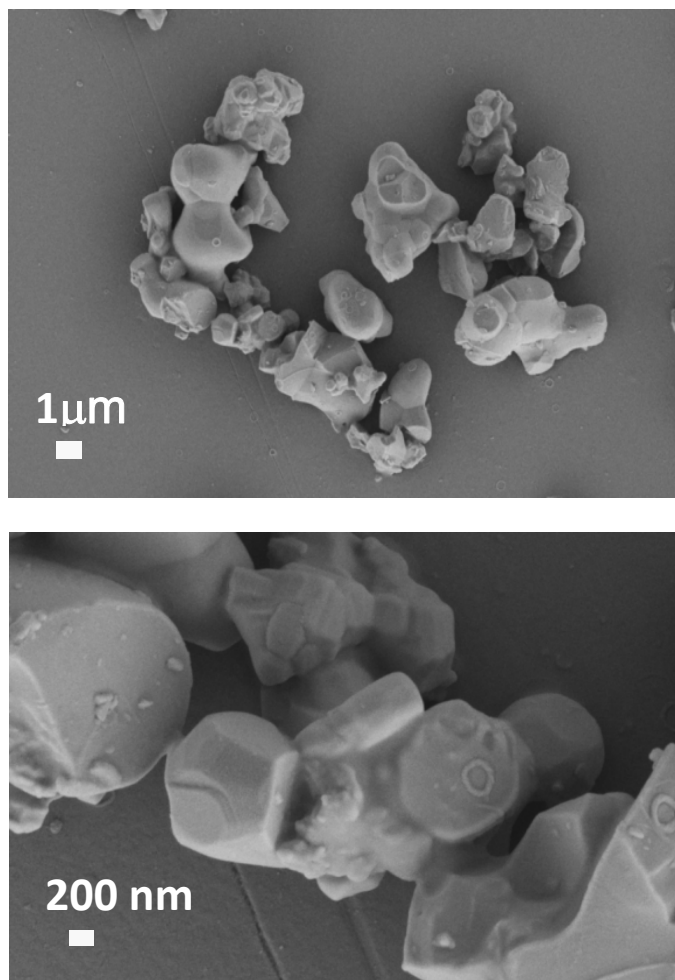

**Fig. S1** SEM images of Mo<sub>2</sub>C MPs purchased from Alfa Aesar.

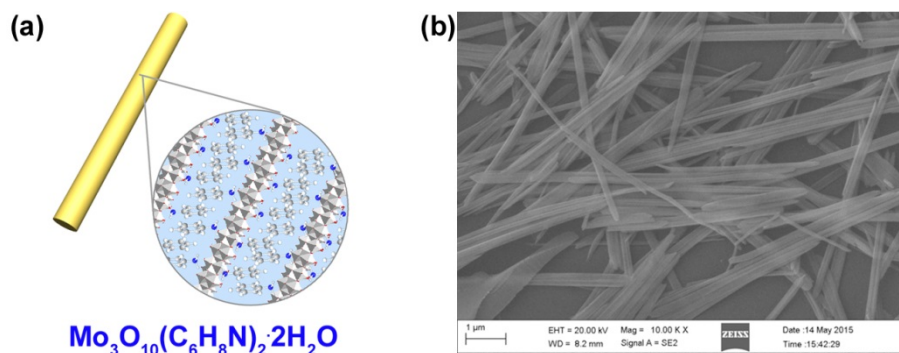

**Fig. S2** (a) Illustration of the structure and (b) SEM image of the Mo<sub>3</sub>O<sub>10</sub>(C<sub>6</sub>H<sub>8</sub>N)<sub>2</sub>·2H<sub>2</sub>O NWs

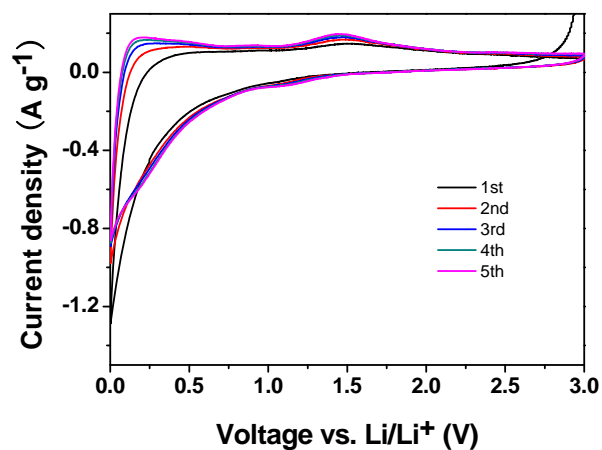

**Fig. S3** CV profiles of the Mo<sub>2</sub>C MPs in the initial five successive cycles at a scan rate of 0.5 mV s<sup>-1</sup>.

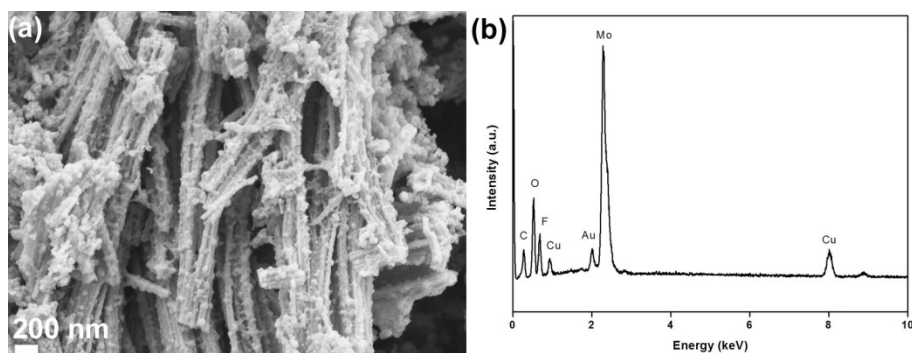

**Fig. S4** (a) SEM image and (b) EDS of the Mo<sub>2</sub>C/N-C MHNWs after 100 discharge/charge cycles at a current density of 2 A g<sup>-1</sup>. The nanowire structure of the Mo<sub>2</sub>C/N-C MHNWs is well maintained during the cycling, which enables the high capacity retention. The presence of Au is associated with the pre-treatment in SEM investigation, and that of F and Cu is owing to the LiPF<sub>6</sub> electrolyte and Cu collector.

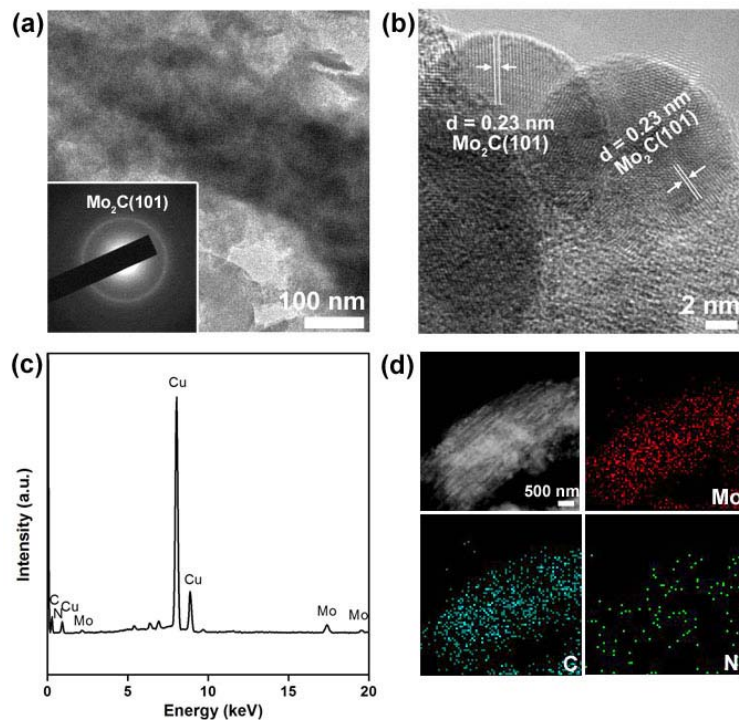

**Fig. S5** (a) TEM and (b) HR-TEM images, (c) EDS and (d) elemental mapping of the  $\text{Mo}_2\text{C}/\text{N-C}$  MHNWs after 100 discharge/charge cycles at a current density of  $2 \text{ A g}^{-1}$ . The inset of (a) displays the SAED pattern obtained on the nanowire after cycles.

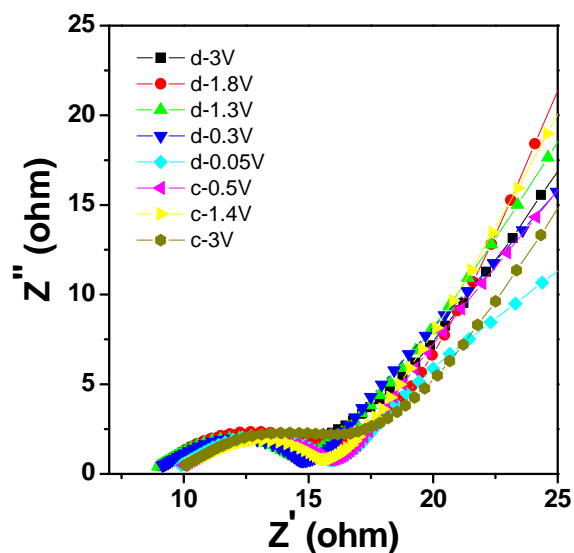

**Fig. S6** Nyquist plots of the  $\text{Mo}_2\text{C}/\text{N-C}$  MHNWs tested in selected states of discharge and charge in the 20<sup>th</sup> cycle.

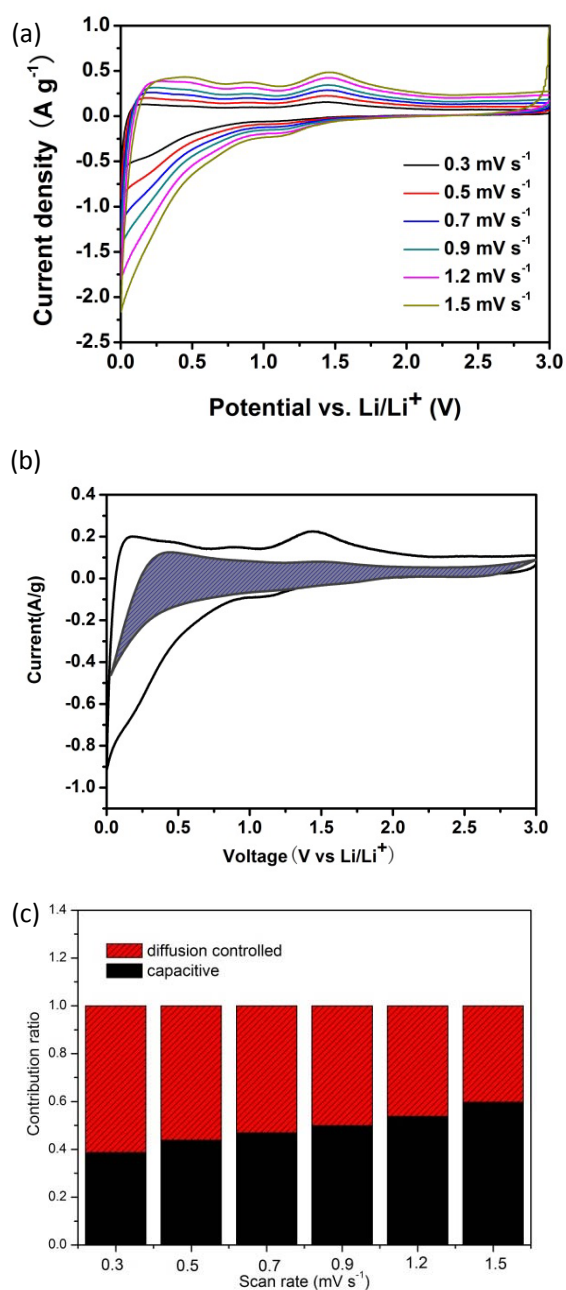

**Fig. S7** Kinetics analysis of the electrochemical behavior towards  $\text{Li}^+$  for the  $\text{Mo}_2\text{C}$  MPs. (a) CV profiles at various scan rates (0.3, 0.5, 0.7, 0.9, 1.2, 1.5  $\text{mV s}^{-1}$ ) after the initial 5 successive cycles (0.5  $\text{mV s}^{-1}$ ), (b) separation of the capacitive and diffusion currents at a scan rate of 0.5  $\text{mV s}^{-1}$ , the capacitive contribution to the total current is shown by the shaded region and (c) contribution ratio of the capacitive and diffusion controlled charge vs. scan rate.

**Table S1** Fitted parameters of the Nyquist plots recorded with the Mo<sub>2</sub>C/N-C MHNWs as the working electrode during the 80<sup>st</sup> discharge/charge cycle at various voltages.

| Cell voltage (V) | R <sub>e</sub> (ohm) | R <sub>sf+ct</sub> (ohm) | Equivalent circuit |
|------------------|----------------------|--------------------------|--------------------|
| d-3              | 8.6                  | 24.0                     | II                 |
| d-1.8            | 8.5                  | 23.9                     | II                 |
| d-1.3            | 9.3                  | 5.0                      | II                 |
| d-0.3            | 9.4                  | 5.0                      | II                 |
| d-0.05           | 9.2                  | 4.8                      | II                 |
| c-0.5            | 9.3                  | 4.8                      | II                 |
| c-1.4            | 9.6                  | 5.2                      | II                 |
| c-3              | 8.8                  | 26.7                     | II                 |

**Table S2** comparison of fitted R<sub>e</sub> and R<sub>sf+ct</sub> of the Mo<sub>2</sub>C/N-C MHNWs and the Mo<sub>2</sub>C MPs tested in the discharged state of 0.05 V in the 80<sup>th</sup> cycle.

| Sample                      | R <sub>e</sub> (ohm) | R <sub>sf+ct</sub> (ohm) | Equivalent circuit |
|-----------------------------|----------------------|--------------------------|--------------------|
| Mo <sub>2</sub> C/N-C MHNWs | 9.2                  | 4.8                      | II                 |
| Mo <sub>2</sub> C MPs       | 7.0                  | 10.6                     | II                 |
